# Supplementary material for: Knowledge, perceptions and experiences of trachoma among Maasai in Tanzania: Implications for prevention and control
Source: PubMed Central journal article supplement (PMC6611635; doi:10.1371/journal.pntd.0007508), 2019-06-24
Supplement: pntd.0007508.s002.pdf [file pntd.0007508.s002.pdf]

**Coding Framework**

| <b>Theme</b>              | <b>Codes</b>             |
|---------------------------|--------------------------|
| <b>What is trachoma?</b>  | symptoms                 |
|                           | infected populations     |
|                           | trichiasis               |
| <b>Causes of trachoma</b> | environmental            |
|                           | supernatural causes      |
|                           | flies                    |
| <b>Prevention</b>         | cleanliness              |
|                           | western medicine         |
|                           | God                      |
| <b>Treatment</b>          | health seeking behavior  |
|                           | local treatment          |
|                           | western treatment        |
|                           | vetinary medicine        |
|                           | God                      |
|                           | decision making          |
|                           | MDA                      |
|                           | epilation for trichiasis |
| <b>Blindness</b>          | causes                   |
|                           | burden                   |
|                           | support systems          |
