# Supplementary material for: Knowledge, perceptions and experiences of trachoma among Maasai in Tanzania: Implications for prevention and control
Source: PubMed Central journal article supplement (PMC6611635; doi:10.1371/journal.pntd.0007508), 2019-06-24
Supplement: pntd.0007508.s003.pdf [file pntd.0007508.s003.pdf]

**Summary of Coding Framework**

| boma | gender | Themes                               |                                                  |                                               |                                                  |                                         |                                                                    |                                               |
|------|--------|--------------------------------------|--------------------------------------------------|-----------------------------------------------|--------------------------------------------------|-----------------------------------------|--------------------------------------------------------------------|-----------------------------------------------|
|      |        | what is trachoma                     | symptoms                                         | causes of trachoma                            | prevention                                       | treatment                               | MDA                                                                | blindness                                     |
| 01   | male   |                                      | pain                                             |                                               | wash eyes, clean whole body, avoid flies         | God, veterinary meds, local tx          | helped                                                             | burden, support, local tx, caused by TT       |
|      | female | children, irritation                 | discharge, crying, red                           | pollen                                        | (unsure)                                         | local tx                                | helped                                                             | old age, curse, burden, support               |
| 02   | male   | kids, eyelid irritation              | swelling, whole body sick, eyes not well         | poor sanitation, flies                        | hospital and medicine                            | local tx                                | helped                                                             | old age, curse, burden, varies by year        |
|      | female | eyelids                              | discharge, swelling, pain, white layer on cornea | sanitation, dust                              | medicine, keep house clean                       | local tx                                | helped children                                                    | old age, curse, burden,                       |
| 03   | male   | everyone at risk, TT                 | discharge, yellow fluid                          | magic/curse                                   | (unsure)                                         | western meds, veterinary meds, hospital | didn't see difference                                              | burden, unsure cause                          |
|      | female | children, eyelids, lead to blindness | spots, swollen, red, can't open eye              | born with it, flies, pollen                   | (unsure)                                         | local tx                                | help, side effects, not sure what they for, take b/c gov't says so | unsure cause, burden, support                 |
| 04   | male   | born with it, TT                     | light sensitivity                                | dust, pollen, eye injury                      | hospital, medicine, clean environment, wash face | western meds                            | helped, side effects                                               | from disease                                  |
|      | female | linked with seasons, TT              | red, swollen                                     | sanitation, pollen, flies, God                | (unsure)                                         | western meds, local tx                  | helped                                                             | TT, burden                                    |
| 05   | female | children, TT                         | swelling, discharge, pain                        | seasonal                                      | (unsure)                                         |                                         | helped                                                             | children and old, burden                      |
| 06   | male   | born with it, TT                     | light sensitivity, discharge                     | smoke, sanitation                             | hospital, medicine                               | veterinary meds, local tx, western meds | was traveling                                                      | God causes, old age, western med helps burden |
|      | female | children, eyelids                    | swelling, spots on eyelid, yellow discharge      | sanitation                                    | (unsure)                                         | local tx                                | (unsure)                                                           | caused by infection (children & old), burden  |
| 07   | male   | sick eyes                            | discharge, itchy, swelling                       | pollen, dust                                  | (unsure)                                         | local tx                                | (unsure)                                                           | caused by western med, local tx helps         |
|      | female | foreign body in eye, TT              | discharge, swelling                              | pollen, dust                                  | water                                            | western meds                            | helped                                                             | caused by God and disease, burden             |
| 08   | male   | unsure, women know                   | swelling, red, itchy                             | weather                                       | God                                              | local tx                                | helped                                                             | old age                                       |
|      | female | TT, born with it                     | itchy, red, discharge, eyes closed in morning    | pollen, whole body is sick                    | medicine                                         | local tx, western meds                  | helped                                                             | cause by scratching, TT                       |
| 09   | male   | TT, from scratching                  | yellow discharge                                 | flies- infection, rain-milk-flies             | no flies                                         | local tx, western meds                  | helped, wasn't around                                              | eye disease, burden                           |
|      | female | (unsure)                             | discharge                                        | (unsure)                                      | (unsure)                                         | local tx                                | unsure they helped                                                 | unsure of cause, burden                       |
| 10   | male   | TT, from sick eyes                   | yellow discharge, red, swelling                  | dust, weather, flies                          | wash face                                        | local tx, western meds                  | helped                                                             | God causes, burden, young and old             |
|      | female | (unsure)                             | red, yellow discharge, swelling                  | (unsure)                                      | wash eyes                                        | God, local tx                           | side effects, contraceptive                                        | old age, women, disease, burden               |
| 11   | male   | born with it                         | irritation, discharge                            | eye injury, God, born with dead flies in eyes | God                                              | local tx, western meds                  | didn't take                                                        | old age, disease, burden, support             |
|      | female | poor vision                          | headache, pain in eye                            | God, flies                                    | God                                              | western meds                            | helped                                                             | old age, disease, burden, support             |
| 12   | male   | can't open eye                       | swelling, red, light sensitivity                 | dust                                          | (unsure)                                         | local tx                                | can't recall                                                       | disease, burden                               |
|      | female | (unsure)                             | discharge, can't open eyes                       | climate                                       | (unsure)                                         | western meds                            |                                                                    | disease, can be treated, burden               |
| 13   | male   | infection                            | red eyelids, itching, yellow discharge           | flies, bacteria, dust, flies                  | brand rings on cheeks, washing                   | local tx                                | didn't take, fear                                                  | caused by smoke, burden                       |
|      | female | leads to blindness                   | infection, swelling, light sensitivity           | flies                                         | (unsure)                                         | western meds, veterinary meds, hospital | didn't help                                                        | disease, burden, support                      |
| 14   | female | (unsure)                             | discharge                                        | God, dead flies                               | wash eyes                                        | local tx, western meds                  | side effects                                                       | happens in children, burden                   |
| 15   | female | (unsure)                             | light sensitivity, discharge, tearing            | dust                                          | (unsure)                                         | local tx, western meds                  | can't recall                                                       | burden                                        |
